# Supplementary material
Source: HighWire-hosted journal article supplement (https://www.jneurosci.org/content/40/4/932)
Supplement: inline-supplementary-material-4 [file inline-supplementary-material-4.docx]

| Matrix Family | Family Information | TranscriptonFactors | *p*-value | Common to #sequences |
| --- | --- | --- | --- | --- |
| V$NBRE | Nuclear Receptors  Subfamily 4 Group A | NR4A1 NR4A2 NR4A3 | 4.54443E-32 | 67 |
| V$ESRR | Estrogen Related Receptors | ESRRA ESRRB ESRRG | 1.23097E-16 | 77 |
